# Supplementary material
Source: publisher figshare collection journal article supplement (https://sage.figshare.com/ndownloader/files/12738641)
Supplement: Supplementary file 1 [file 12738641]

**Table A1. Unit root test results**

|       | ADF test statistic |           | PP test results |           |
|-------|--------------------|-----------|-----------------|-----------|
|       | level              | % change  | Level           | % change  |
| STOXX | 0.82               | -5.98***  | -1.54           | -13.52*** |
| CPI   | 0.69               | -5.58***  | -0.63           | -13.14*** |
| OIL   | 0.68               | -6.01***  | -1.78           | -12.78*** |
| M2    | 0.49               | -4.27***  | 1.71            | -15.37*** |
| INT   | 0.27               | -3.82**   | -1.05           | -10.21*** |
| IPC1  | 0.05               | -14.79*** | -3.42**         | -25.98*** |
| IP1   | 0.41               | -13.80*** | -2.49           | -16.26*** |
| GEP1  | 0.14               | -7.60***  | -3.46**         | -17.53*** |
| GEP2  | 0.22               | -7.50***  | -3.06**         | -17.90*** |
| EPU   | 0.20               | -6.83***  | -4.12***        | -20.23*** |
| CCI   | 0.24               | -4.30***  | -2.08           | -4.90***  |

Note: We perform an Augmented Dickey-Fuller (ADF) test as well as Phillips-Perron (PP) test to observe stationarity in the utilized variables. The null hypothesis is that there exists a unit root in a given series. For both tests, statistics are given for level data and % change data. Lag order (L) is 6. We repeat the analysis with L=2 and L=10 obtaining qualitatively same results. Table reports results on tests with an assumption of no trend. We also repeat the analysis with the assumption of a trend and results are qualitatively identical. \*, \*\* and \*\*\* present significance at 10%, 5% and 1% levels, respectively.
